# Supplementary material
Source: Research Square preprint supplement (doi:10.21203/rs.3.rs-9043606/v1)
Supplement: Supplementary file 1 [file 14bc4b56c76232c5f04ab68e.docx]

Supplementary Materials

For submission to: Current Tropical Medicine Reports (Review Article)

**Manuscript:** Dengue trends and climate-epidemiologic associations in India, 2021-2024

Manuscript ID: Not assigned (Current Tropical Medicine Reports submission)

**Authors:** Siddalingaiah H S, Rahul Karthik, Sangamesh S

____________________________________________________________

# Table of Contents

1. Supplementary Table S1: Complete State-wise Dengue Data (2021-2024)

2. Supplementary Table S2: Climate Data by State (2021-2024 Means)

3. Supplementary Table S3: Full Regression Model Output with Diagnostics

4. Supplementary Methods: Data Processing Details

5. Supplementary Figure S1: Regression Diagnostics

6. Supplementary Figure S2: India Map with Absolute Case Counts

7. Data Availability Details

# Supplementary Table S1: Complete State-wise Dengue Data, 2021-2024

| **State/UT** | **2021 Cases** | **2021 Deaths** | **2022 Cases** | **2022 Deaths** | **2023 Cases** | **2023 Deaths** | **2024 Cases** | **2024 Deaths** | **Total** | **CFR (%)** |
| --- | --- | --- | --- | --- | --- | --- | --- | --- | --- | --- |
| Karnataka | 17,490 | 4 | 23,651 | 10 | 28,327 | 22 | 32,886 | 27 | 102,354 | 0.06 |
| Tamil Nadu | 14,556 | 13 | 19,475 | 15 | 33,876 | 32 | 27,378 | 11 | 95,285 | 0.07 |
| Maharashtra | 17,632 | 40 | 22,867 | 75 | 19,218 | 58 | 19,385 | 54 | 79,102 | 0.29 |
| Punjab | 23,387 | 81 | 17,168 | 47 | 26,459 | 40 | 6,260 | 18 | 73,274 | 0.25 |
| Kerala | 13,358 | 81 | 17,639 | 115 | 20,926 | 130 | 20,674 | 128 | 72,597 | 0.63 |
| Rajasthan | 10,461 | 19 | 15,862 | 18 | 34,355 | 44 | 11,548 | 6 | 72,226 | 0.12 |
| Uttar Pradesh | 29,757 | 38 | 27,851 | 23 | 27,233 | 25 | 15,868 | 9 | 100,709 | 0.09 |
| Gujarat | 8,673 | 15 | 10,382 | 9 | 15,328 | 11 | 5,614 | 2 | 39,997 | 0.09 |
| Delhi | 9,613 | 23 | 9,830 | 10 | 9,402 | 1 | 10,585 | 11 | 39,430 | 0.11 |
| Bihar | 633 | 3 | 3,491 | 7 | 16,542 | 49 | 10,157 | 17 | 30,823 | 0.25 |
| ... (continued) |  |  |  |  |  |  |  |  |  |  |
| **INDIA TOTAL** | 193,245 | 346 | 233,251 | 303 | 289,235 | 485 | 233,519 | 297 | 949,250 | 0.15 |

Data source: National Vector Borne Disease Control Programme (NVBDCP)

# Supplementary Table S2: Climate Data by State (Mean 2021-2024)

| **State/UT** | **Mean Temp (°C)** | **Precipitation (mm/yr)** | **Climate Zone** |
| --- | --- | --- | --- |
| Karnataka | 26.2 | 1,248 | Tropical |
| Tamil Nadu | 28.6 | 998 | Tropical |
| Kerala | 27.1 | 2,817 | Tropical |
| Maharashtra | 27.0 | 1,127 | Tropical |
| Delhi | 25.8 | 617 | Semi-arid |
| Bihar | 26.1 | 1,187 | Subtropical |
| Rajasthan | 26.4 | 531 | Arid/Semi-arid |
| Gujarat | 27.1 | 718 | Semi-arid |
| Assam | 23.9 | 2,284 | Subtropical |
| Manipur | 21.8 | 1,467 | Subtropical |
| Lakshadweep | 28.1 | 1,642 | Tropical |

Data source: NASA POWER (2021-2024 annual means)

# Supplementary Table S3: Full Regression Model Output

## Model Specification

**Dependent variable:** log(incidence + 1)

**Method:** OLS with HC3 robust standard errors

**Sample:** n=136 state-year observations (2021-2024)

**R-squared:** 0.316

**Adjusted R-squared:** 0.268

**F-statistic:** 7.63 (p<0.001)

## Coefficient Estimates

| **Variable** | **Coefficient** | **Robust SE** | **t-value** | **P-value** | **95% CI** |
| --- | --- | --- | --- | --- | --- |
| Temperature (z) | 0.309 | 0.128 | 2.40 | 0.017 | [0.05, 0.56] |
| Precipitation (z) | -0.065 | 0.099 | -0.65 | 0.515 | [-0.26, 0.13] |
| Population density (z) | 0.161 | 0.128 | 1.26 | 0.209 | [-0.09, 0.41] |
| Urban % (z) | -0.102 | 0.181 | -0.57 | 0.573 | [-0.46, 0.26] |
| GDP per capita (z) | 0.505 | 0.115 | 4.40 | <0.001 | [0.28, 0.73] |
| SECI score (z) | 0.024 | 0.147 | 0.17 | 0.869 | [-0.27, 0.32] |
| Year 2022 | 0.396 | 0.268 | 1.48 | 0.142 | [-0.13, 0.93] |
| Year 2023 | 0.851 | 0.260 | 3.28 | 0.001 | [0.34, 1.37] |
| Year 2024 | 0.365 | 0.253 | 1.44 | 0.153 | [-0.14, 0.87] |
| Intercept | 2.418 | 0.172 | 14.03 | <0.001 | [2.08, 2.76] |

Notes: z-scores calculated within sample; HC3 robust standard errors used

# Supplementary Figure S1: Regression Diagnostics


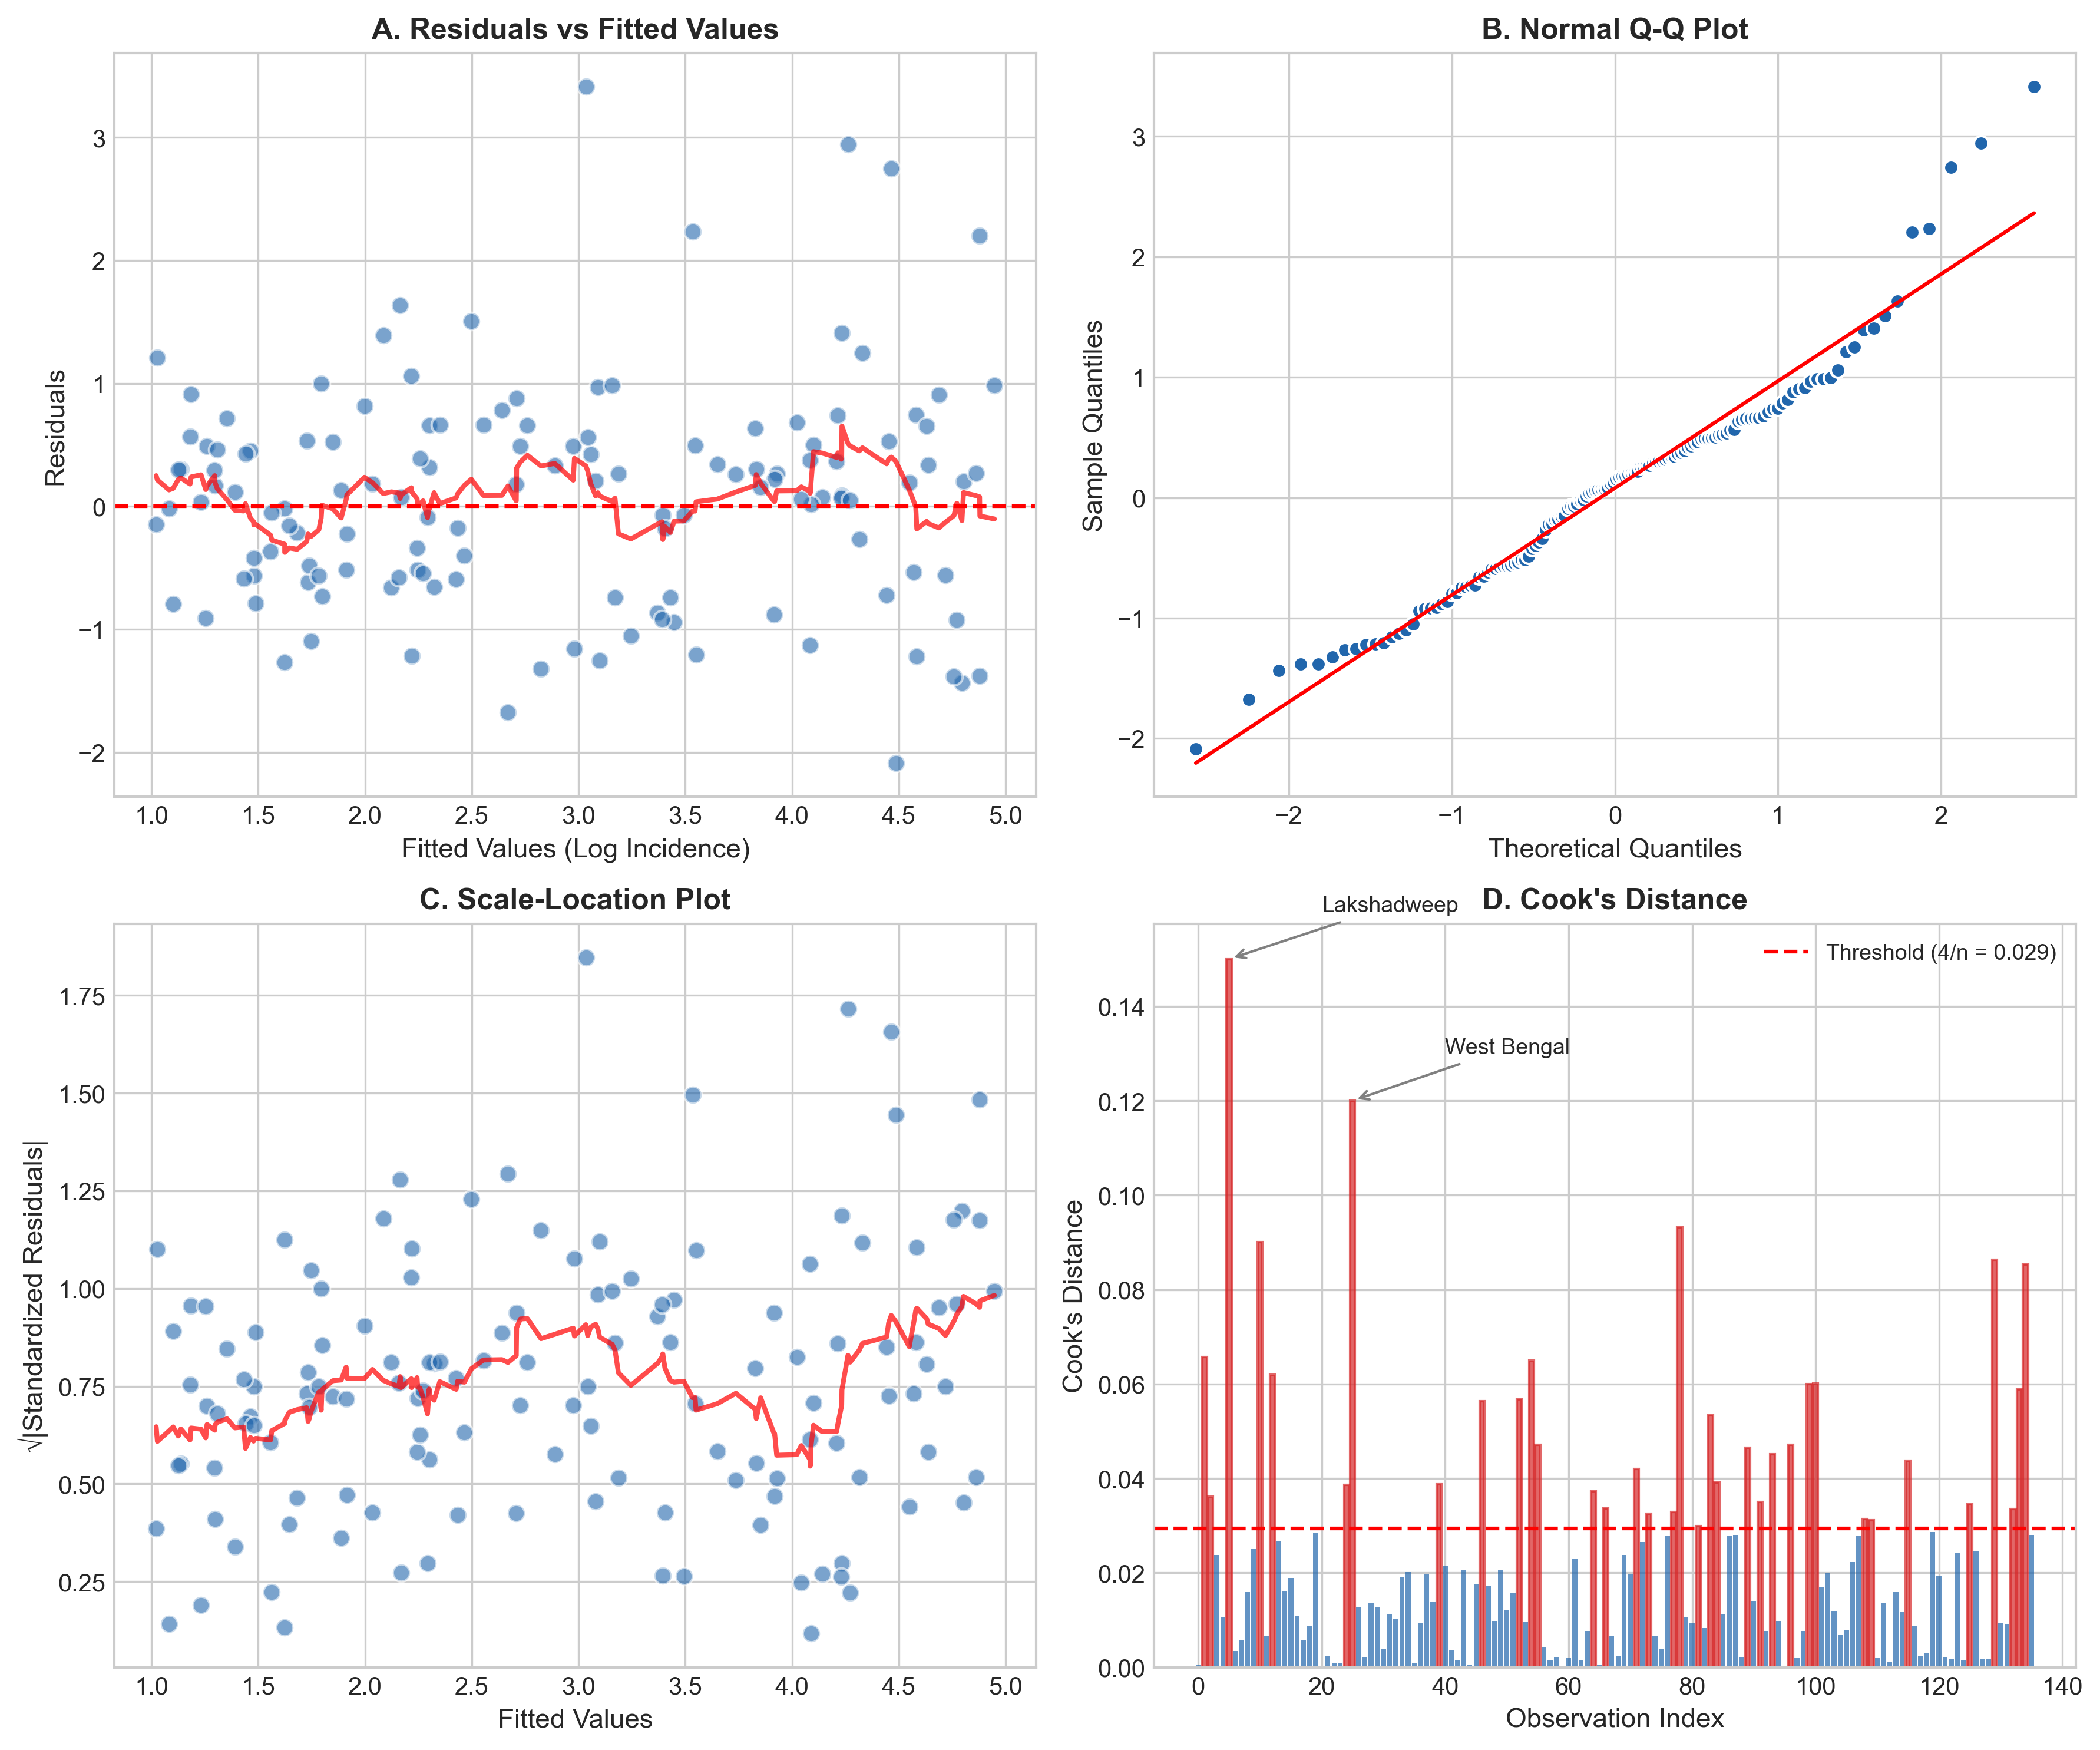


**Figure S1. Regression Diagnostics.** (A) Residuals vs fitted values showing reasonable homoskedasticity; (B) Q-Q plot of residuals indicating approximate normality; (C) Scale-location plot confirming heteroskedasticity pattern necessitating robust SE; (D) Cook's distance identifying influential observations (Lakshadweep, West Bengal 2024, Bihar 2023).

# Supplementary Figure S2: State-wise Absolute Case Burden, 2024


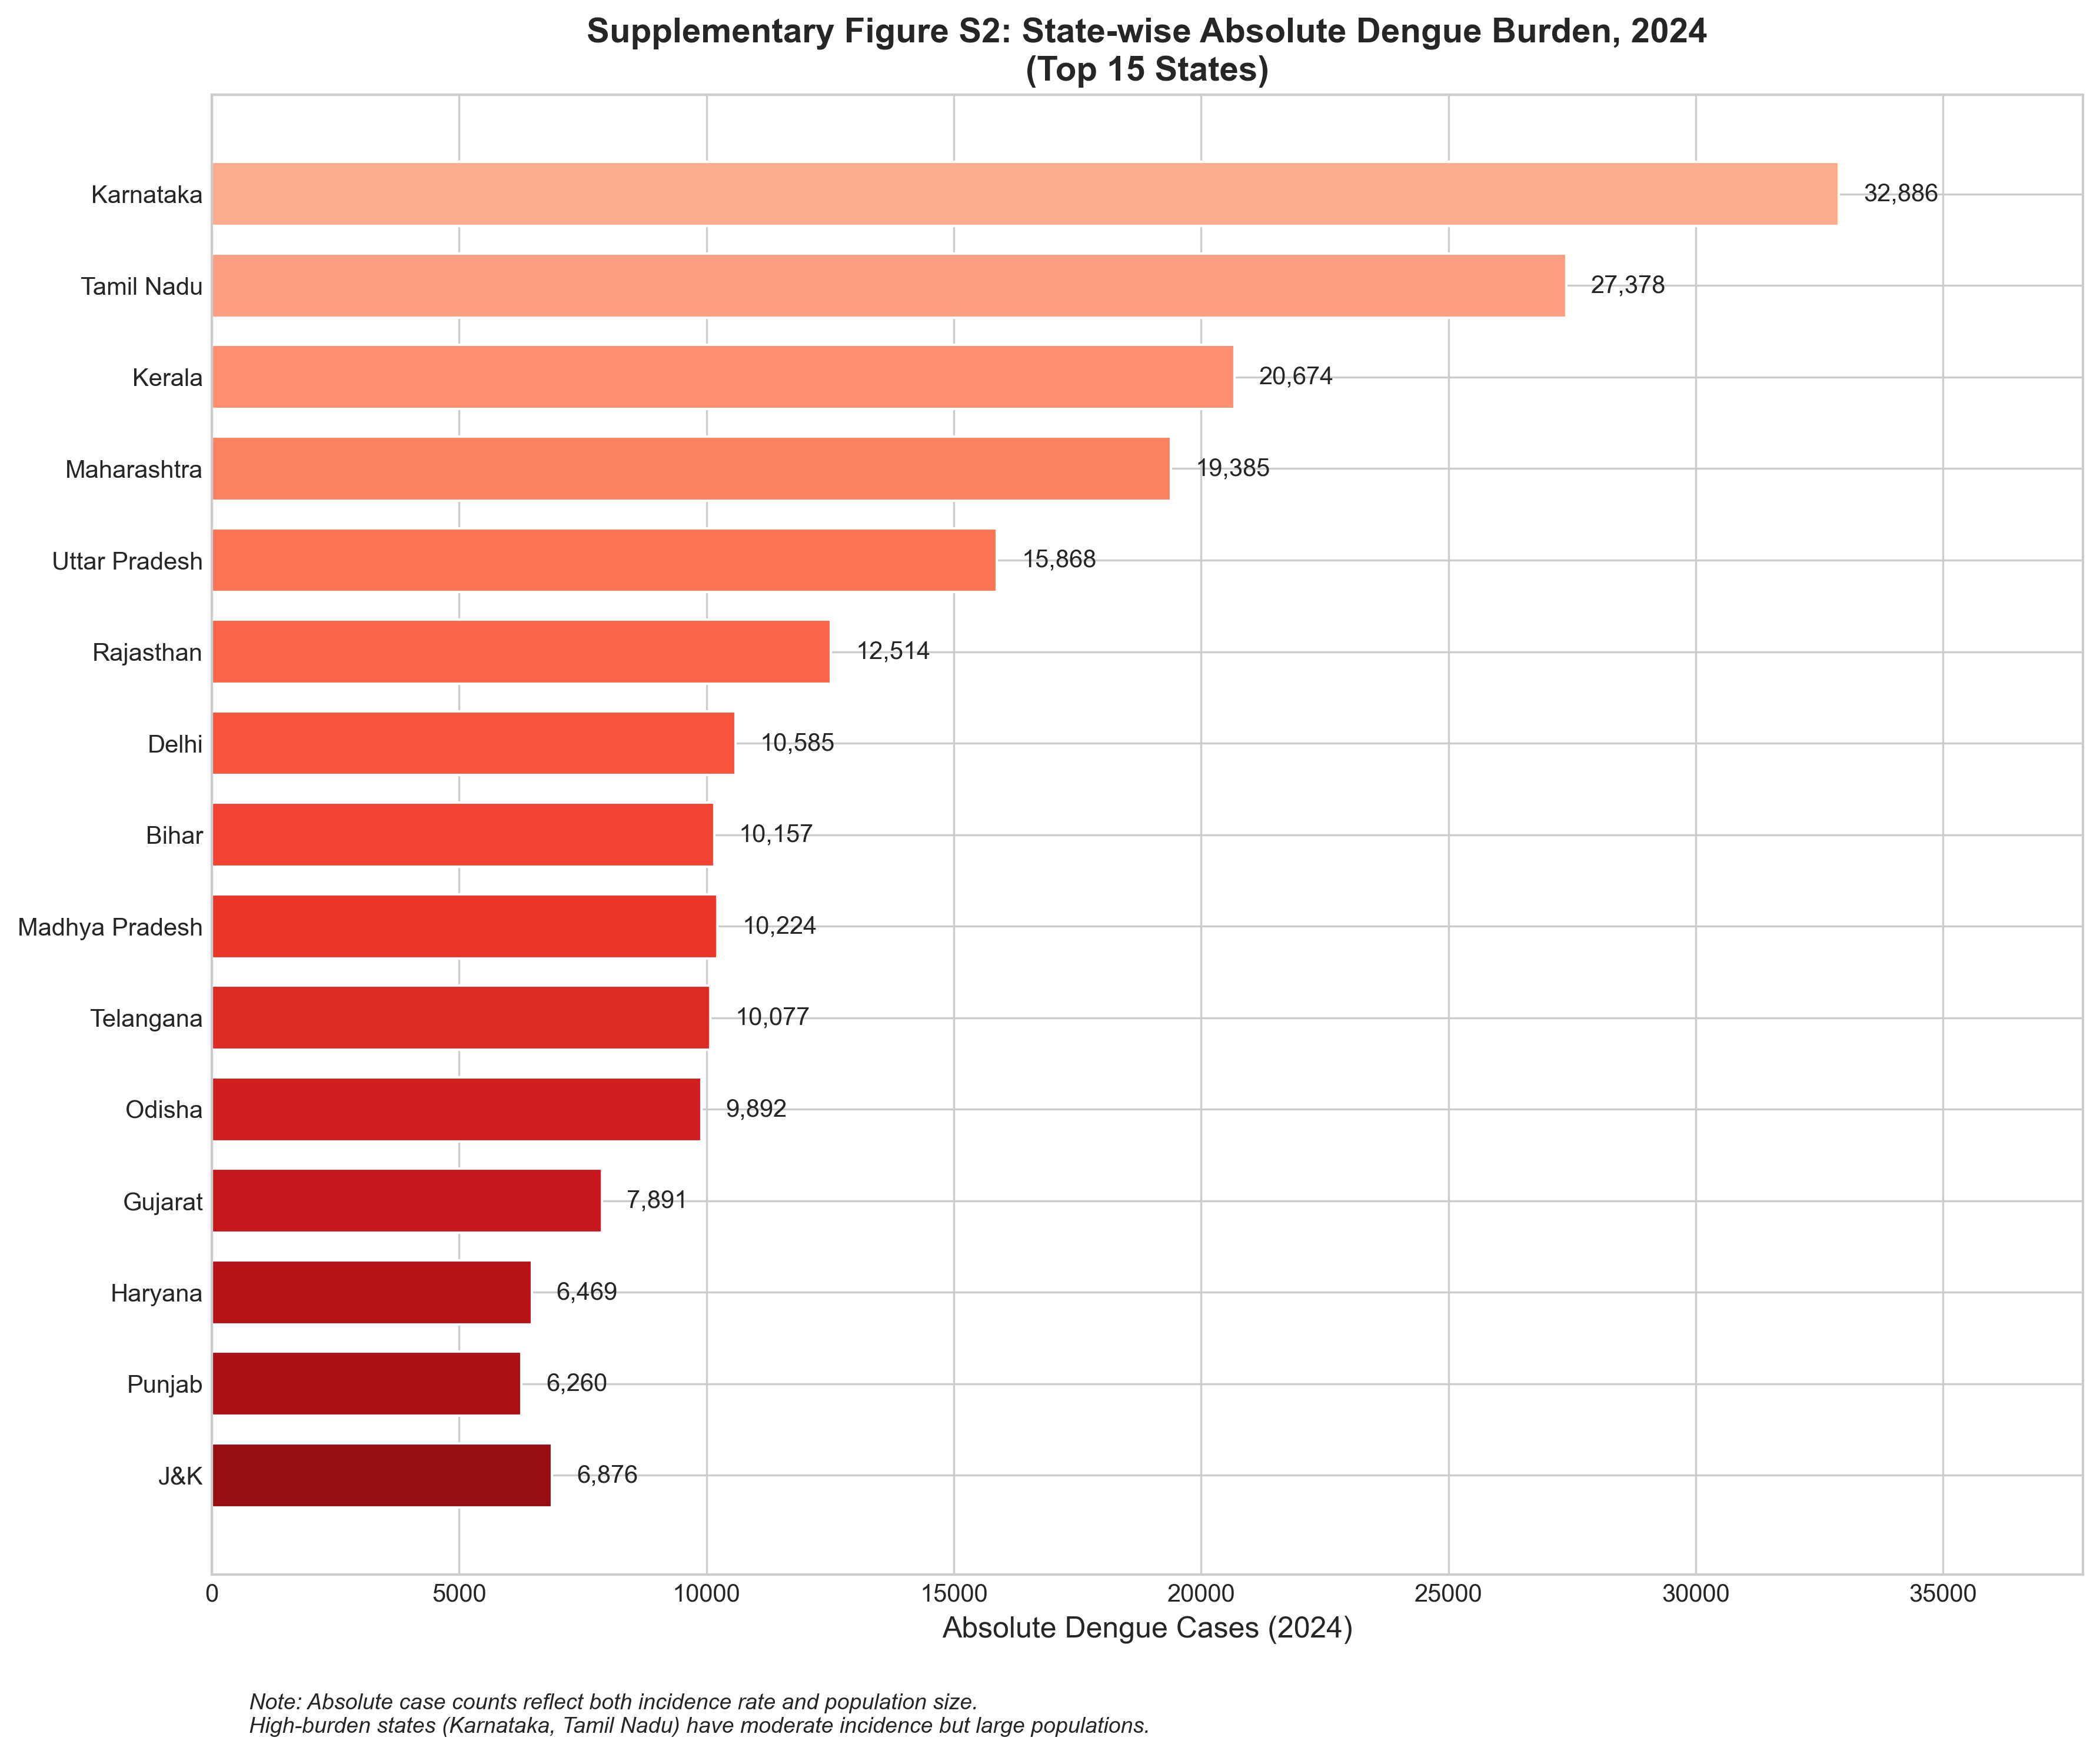


**Figure S2. Absolute Dengue Case Burden by State, 2024.** Bar chart showing top 15 states by absolute case counts. Highest burden states (Karnataka: 32,886; Tamil Nadu: 27,378; Kerala: 20,674) reflect both moderate-to-high incidence rates and large population denominators. This complements the incidence map (Figure 1B), demonstrating that highest incidence states (Lakshadweep, Puducherry) have relatively low absolute burden due to small populations.

# Data Availability Details

| **Data Type** | **Source** | **URL** | **Access Date** |
| --- | --- | --- | --- |
| Dengue surveillance | NVBDCP | https://nvbdcp.gov.in/ | 2026-01-15 |
| Climate data | NASA POWER | https://power.larc.nasa.gov/ | 2026-01-20 |
| Population | Census of India | https://censusindia.gov.in/ | 2026-01-10 |
| GDP per capita | RBI | https://rbi.org.in/ | 2026-01-12 |
| SECI scores | NITI Aayog | https://niti.gov.in/ | 2026-01-12 |

Python analysis scripts and processed datasets are available from the corresponding author upon reasonable request.

____________________________________________________________

End of Supplementary Materials
